# Supplementary material for: First principles rationale of strain-induced modifications in hybrid double halide perovskite: optoelectronics and photovoltaic perspectives
Source: Royal Society of Chemistry journal article supplement (doi:10.1039/d6ra02285e), 2026-05-12
Supplement: d6ra02285e1.pdf [file d6ra02285e1.pdf]

## Supplementary Material

### **First principles rationale of strain-induced modifications in hybrid double halide perovskite: optoelectronics and photovoltaic perspectives**

Tanmoy Kalita<sup>a</sup>, Manjet Rajak<sup>a</sup>, and Dhruba Jyoti Kalita<sup>a\*</sup>

<sup>a</sup>Department of Chemistry, Gauhati University

Electronic mail: dhrubajyoti.kalita@gauhati.ac.in

**Table S1: Calculated lattice parameters and band gap ( $E_g$ ) values of the reference perovskite material.**

| Compound                            | Functionals | Theoretical |            | Experimental   |            |
|-------------------------------------|-------------|-------------|------------|----------------|------------|
|                                     |             | a=b=c(Å)    | $E_g$ (eV) | a=b=c(Å)       | $E_g$ (eV) |
| Cs <sub>2</sub> AgBiCl <sub>6</sub> | LDA         | 10.616      | 1.6        | 10.777 ± 0.005 | 2.2        |
|                                     | PBE         | 11.089      | 1.8        |                |            |
|                                     | PBEsol      | 10.824      | 1.7        |                |            |
|                                     | PBE0        | 10.749      | 4.2        |                |            |
|                                     | HSE06       | 10.889      | 2.7        |                |            |

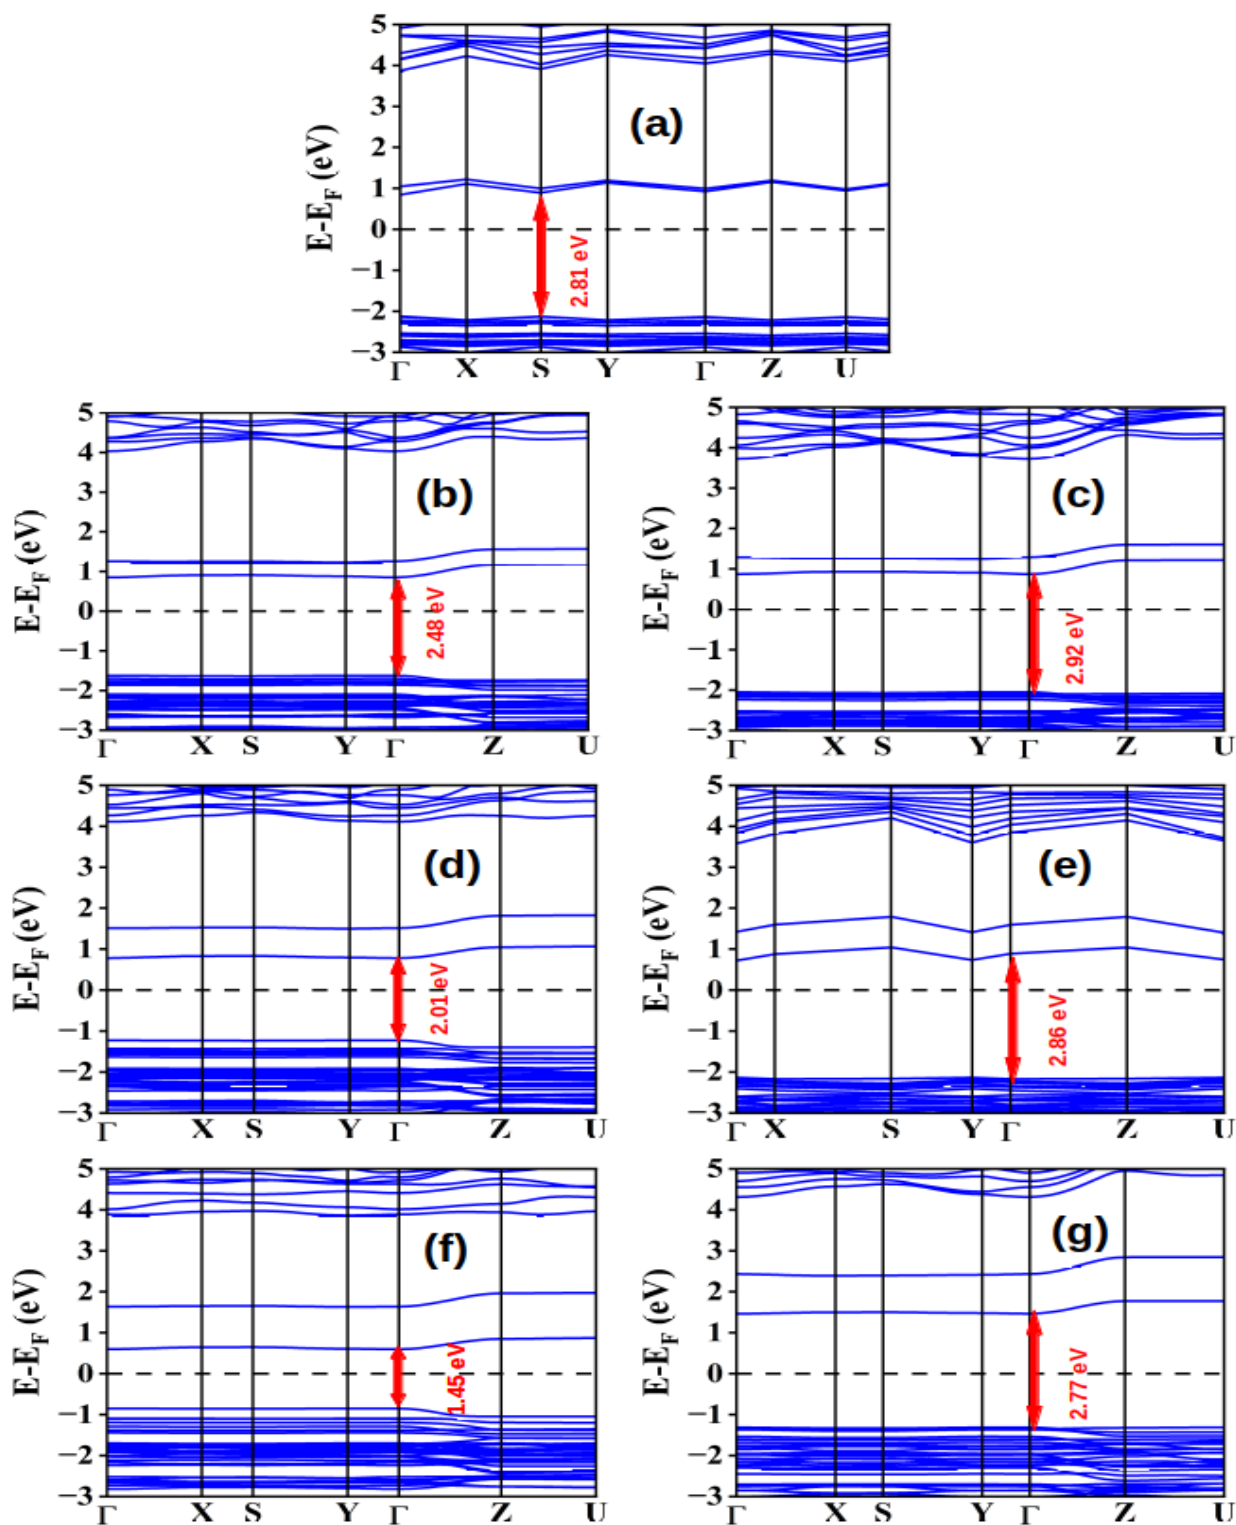

**Fig. S1:** Calculated band structures of  $(\text{DMA})_2\text{SnCl}_6$  applying different percentile of strain: (a) 0%, (b,d,f) 2%, 4%, and 6% tensile strain, and (c, e, g) 2%, 4%, and 6% compressive strain, respectively.

**Table S2: Coordinates of the optimized geometries of the studied compound under different percentile of strain employing PBE XC functional.**

**0% Strain**

| <u>Atoms</u> | <u>Coordinates (Å)</u> |               |               |
|--------------|------------------------|---------------|---------------|
|              | <u>X</u>               | <u>Y</u>      | <u>Z</u>      |
| Sn           | 0.0000000000           | 0.0000000000  | -0.0000000000 |
| Sn           | 3.7514610000           | 7.3467290000  | 3.6942970000  |
| H            | 0.4930818244           | 9.8596474032  | 0.8981150399  |
| H            | 7.0098391756           | 4.8338105968  | 6.4904779601  |
| H            | 7.0098391756           | 4.8338105968  | 0.8981150399  |
| H            | 0.4930818244           | 9.8596474032  | 6.4904779601  |
| H            | 4.2445428244           | 12.1805395968 | 2.7961809601  |
| H            | 3.2583781756           | 2.5129184032  | 4.5924120399  |
| H            | 3.2583781756           | 2.5129184032  | 2.7961809601  |
| H            | 4.2445428244           | 12.1805395968 | 4.5924120399  |
| H            | 1.1117051946           | 1.4014529774  | 2.8711217970  |
| H            | 6.3912158054           | 13.2920050226 | 4.5174712030  |
| H            | 6.3912158054           | 13.2920050226 | 2.8711217970  |
| H            | 1.1117051946           | 1.4014529774  | 4.5174712030  |
| H            | 4.8631651946           | 5.9452760226  | 0.8231742030  |
| H            | 2.6397558054           | 8.7481819774  | 6.5654187970  |
| H            | 2.6397558054           | 8.7481819774  | 0.8231742030  |
| H            | 4.8631651946           | 5.9452760226  | 6.5654187970  |
| H            | 1.1558939393           | 3.8367270687  | 2.8019854144  |
| H            | 6.3470270607           | 10.8567309313 | 4.5866075856  |
| H            | 6.3470270607           | 10.8567309313 | 2.8019854144  |
| H            | 1.1558939393           | 3.8367270687  | 4.5866075856  |
| H            | 4.9073539393           | 3.5100019313  | 0.8923115856  |
| H            | 2.5955670607           | 11.1834560687 | 6.4962814144  |
| H            | 2.5955670607           | 11.1834560687 | 0.8923115856  |
| H            | 4.9073539393           | 3.5100019313  | 6.4962814144  |
| H            | 0.2692688016           | 11.4975833562 | 3.6942970000  |
| H            | 7.2336521984           | 3.1958746438  | 3.6942960000  |
| H            | 4.0207298016           | 10.5426036438 | 0.0000000000  |

|    |              |               |               |
|----|--------------|---------------|---------------|
| H  | 3.4821911984 | 4.1508543562  | 0.0000000000  |
| H  | 0.4460664103 | 8.3089935062  | 0.0000000000  |
| H  | 7.0568545897 | 6.3844644938  | 0.0000000000  |
| H  | 4.1975264103 | 13.7311934938 | 3.6942970000  |
| H  | 3.3053945897 | 0.9622645062  | 3.6942970000  |
| C  | 0.8179975747 | 3.3006456895  | 3.6942970000  |
| C  | 6.6849234253 | 11.3928123105 | 3.6942960000  |
| C  | 4.5694575747 | 4.0460833105  | -0.0000000000 |
| C  | 2.9334634253 | 10.6473746895 | 0.0000000000  |
| C  | 0.8254279026 | 9.3322347754  | -0.0000000000 |
| C  | 6.6774930974 | 5.3612232246  | -0.0000000000 |
| C  | 4.5768879026 | 12.7079522246 | 3.6942970000  |
| C  | 2.9260330974 | 1.9855057754  | 3.6942970000  |
| N  | 1.4359505948 | 1.9420523189  | 3.6942970000  |
| N  | 6.0669704052 | 12.7514056811 | 3.6942960000  |
| N  | 5.1874105948 | 5.4046766811  | -0.0000000000 |
| N  | 2.3155104052 | 9.2887813189  | 0.0000000000  |
| Cl | 1.4441173133 | 13.7551015705 | 1.7688095689  |
| Cl | 6.0588036867 | 0.9383564295  | 5.6197834311  |
| Cl | 6.0588036867 | 0.9383564295  | 1.7688095689  |
| Cl | 1.4441173133 | 13.7551015705 | 5.6197834311  |
| Cl | 5.1955783133 | 8.2850854295  | 1.9254864311  |
| Cl | 2.3073426867 | 6.4083725705  | 5.4631065689  |
| Cl | 2.3073426867 | 6.4083725705  | 1.9254864311  |
| Cl | 5.1955783133 | 8.2850854295  | 5.4631065689  |
| Cl | 1.3311816796 | 2.0859672310  | -0.0000000000 |
| Cl | 6.1717393204 | 12.6074907690 | -0.0000000000 |
| Cl | 5.0826426796 | 5.2607617690  | 3.6942970000  |
| Cl | 2.4202783204 | 9.4326962310  | 3.6942970000  |

## **2% Tensile Strain**

### **Along x-axis**

|    |               |               |              |
|----|---------------|---------------|--------------|
| Sn | -0.0660400610 | -0.0013482125 | 0.0000000000 |
| Sn | 3.7514347410  | 7.3467445262  | 3.6942970000 |
| H  | 0.4919499453  | 9.8560607105  | 0.8979174068 |

|   |              |               |              |
|---|--------------|---------------|--------------|
| H | 7.0111644319 | 4.8374310740  | 6.4906394916 |
| H | 7.0111644319 | 4.8374310740  | 0.8979535084 |
| H | 0.4919499453 | 9.8560607105  | 6.4906755932 |
| H | 4.2594888341 | 12.1780094153 | 2.7971484390 |
| H | 3.2432069635 | 2.5155719446  | 4.5915950348 |
| H | 3.2432069635 | 2.5155719446  | 2.7969979652 |
| H | 4.2594888341 | 12.1780094153 | 4.5914445610 |
| H | 1.1021878984 | 1.3978582939  | 2.8703479100 |
| H | 6.4002642909 | 13.2968569095 | 4.5183311463 |
| H | 6.4002642909 | 13.2968569095 | 2.8702618537 |
| H | 1.1021878984 | 1.3978582939  | 4.5182450900 |
| H | 4.8621178496 | 5.9453510086  | 0.8236816199 |
| H | 2.6407855192 | 8.7479222155  | 6.5649474572 |
| H | 2.6407855192 | 8.7479222155  | 0.8236455428 |
| H | 4.8621178496 | 5.9453510086  | 6.5649113801 |
| H | 1.1283780149 | 3.8318705143  | 2.8030551091 |
| H | 6.3746918663 | 10.8624347755 | 4.5855217424 |
| H | 6.3746918663 | 10.8624347755 | 2.8030712576 |
| H | 1.1283780149 | 3.8318705143  | 4.5855378909 |
| H | 4.9039966157 | 3.5122536260  | 0.8926056012 |
| H | 2.5991604536 | 11.1811998986 | 6.4961749066 |
| H | 2.5991604536 | 11.1811998986 | 0.8924180934 |
| H | 4.9039966157 | 3.5122536260  | 6.4959873988 |
| H | 0.1419646374 | 11.5204311460 | 3.6942970000 |
| H | 7.3611223399 | 3.1740059011  | 3.6942960000 |
| H | 4.0243204416 | 10.5378674562 | 0.0000000000 |
| H | 3.4787869830 | 4.1550375070  | 0.0000000000 |
| H | 0.4489334133 | 8.3040330175  | 0.0000000000 |
| H | 7.0539884497 | 6.3892951051  | 0.0000000000 |
| H | 4.2075372552 | 13.7290585159 | 3.6942970000 |
| H | 3.2942436408 | 0.9643219106  | 3.6942970000 |
| C | 0.7944093640 | 3.2922272983  | 3.6942970000 |
| C | 6.7086089669 | 11.4020906714 | 3.6942960000 |
| C | 4.5664068379 | 4.0480614387  | 0.0000000000 |
| C | 2.9366336101 | 10.6451552761 | 0.0000000000 |

|    |              |               |              |
|----|--------------|---------------|--------------|
| C  | 0.8257189610 | 9.3287822864  | 0.0000000000 |
| C  | 6.6771989091 | 5.3646435173  | 0.0000000000 |
| C  | 4.5910020512 | 12.7068995002 | 3.6942970000 |
| C  | 2.9117911220 | 1.9868550760  | 3.6942970000 |
| N  | 1.4224777244 | 1.9391467682  | 3.6942970000 |
| N  | 6.0804680398 | 12.7552418752 | 3.6942960000 |
| N  | 5.1864336325 | 5.4056963407  | 0.0000000000 |
| N  | 2.3165368761 | 9.2875273893  | 0.0000000000 |
| Cl | 1.3858090510 | 13.7548337676 | 1.7692173460 |
| Cl | 6.1406912851 | 0.9379739280  | 5.6160223296 |
| Cl | 6.1406912851 | 0.9379739280  | 1.7725706704 |
| Cl | 1.3858090510 | 13.7548337676 | 5.6193756540 |
| Cl | 5.2015334796 | 8.2884992254  | 1.9270026945 |
| Cl | 2.3010250329 | 6.4049830856  | 5.4616354836 |
| Cl | 2.3010250329 | 6.4049830856  | 1.9269575164 |
| Cl | 5.2015334796 | 8.2884992254  | 5.4615903055 |
| Cl | 1.2649756625 | 2.0908255479  | 0.0000000000 |
| Cl | 6.2585362544 | 12.5990648001 | 0.0000000000 |
| Cl | 5.0836894125 | 5.2571679865  | 3.6942970000 |
| Cl | 2.4191666703 | 9.4364995685  | 3.6942970000 |

## **2% Tensile Strain**

### **Along y-axis**

|    |               |               |              |
|----|---------------|---------------|--------------|
| Sn | -0.7659885507 | -0.2369092282 | 0.0000000000 |
| Sn | 3.7934031971  | 7.3372481865  | 3.6942970000 |
| H  | 0.7842985008  | 9.9709517367  | 0.9021862689 |
| H  | 6.7701550736  | 4.7324342819  | 6.4893720150 |
| H  | 6.7701550736  | 4.7324342819  | 0.8992209850 |
| H  | 0.7842985008  | 9.9709517367  | 6.4864067311 |
| H  | 4.1759307374  | 13.2804271118 | 2.8009140411 |
| H  | 3.1653718553  | 1.8707720158  | 4.5911768849 |
| H  | 3.1653718553  | 1.8707720158  | 2.7974161151 |
| H  | 4.1759307374  | 13.2804271118 | 4.5876789589 |
| H  | 0.7250667882  | 1.5240734662  | 2.8752287573 |
| H  | 6.6634387032  | 13.2515473455 | 4.4989847166 |

|    |               |               |              |
|----|---------------|---------------|--------------|
| H  | 6.6634387032  | 13.2515473455 | 2.8896082834 |
| H  | 0.7250667882  | 1.5240734662  | 4.5133642427 |
| H  | 4.6041390265  | 5.8176742887  | 0.8247035283 |
| H  | 2.7740289558  | 8.6131189937  | 6.5650326523 |
| H  | 2.7740289558  | 8.6131189937  | 0.8235603477 |
| H  | 4.6041390265  | 5.8176742887  | 6.5638894717 |
| H  | 1.5165455594  | 3.8317099516  | 2.8043043073 |
| H  | 5.4534778362  | 11.1446345471 | 4.5889022598 |
| H  | 5.4534778362  | 11.1446345471 | 2.7996907402 |
| H  | 1.5165455594  | 3.8317099516  | 4.5842886927 |
| H  | 4.6498676029  | 3.3984311215  | 0.8921596926 |
| H  | 3.0332169320  | 11.0288957470 | 6.4901314071 |
| H  | 3.0332169320  | 11.0288957470 | 0.8984615929 |
| H  | 4.6498676029  | 3.3984311215  | 6.4964333074 |
| H  | -0.4834411274 | 11.0698539489 | 3.6942970000 |
| H  | 7.4842821178  | 3.6021215887  | 3.6942960000 |
| H  | 4.3610744288  | 10.2041491000 | 0.0000000000 |
| H  | 3.2265753852  | 4.0558922232  | 0.0000000000 |
| H  | 0.5523043973  | 8.4335074019  | 0.0000000000 |
| H  | 6.8010063047  | 6.2864302766  | 0.0000000000 |
| H  | 4.8416907566  | 14.6898949948 | 3.6942970000 |
| H  | 2.7306013048  | 0.3859257540  | 3.6942970000 |
| C  | 1.0543577722  | 3.3931466485  | 3.6942970000 |
| C  | 5.9974787519  | 11.4653164577 | 3.6942960000 |
| C  | 4.3136451759  | 3.9352143773  | 0.0000000000 |
| C  | 3.2995228110  | 10.4624178502 | 0.0000000000 |
| C  | 1.0457063884  | 9.4090965774  | 0.0000000000 |
| C  | 6.4339964964  | 5.2573035142  | 0.0000000000 |
| C  | 4.7212262480  | 13.6026334131 | 3.6942970000 |
| C  | 2.6772688540  | 1.4792902832  | 3.6942970000 |
| N  | 1.2468913798  | 1.9091278569  | 3.6942970000 |
| N  | 6.0699336306  | 12.9531109172 | 3.6942960000 |
| N  | 4.9419474193  | 5.2887382306  | 0.0000000000 |
| N  | 2.5193584069  | 9.1916492975  | 0.0000000000 |
| Cl | 1.3315155926  | 13.5524024832 | 2.4273003758 |

|    |              |               |              |
|----|--------------|---------------|--------------|
| Cl | 6.2574531657 | 1.4537588415  | 5.5697885354 |
| Cl | 6.2574531657 | 1.4537588415  | 1.8188044646 |
| Cl | 1.3315155926 | 13.5524024832 | 4.9612926242 |
| Cl | 5.2824073299 | 8.2413569098  | 1.9504297780 |
| Cl | 2.3221106842 | 6.4262669425  | 5.4863384731 |
| Cl | 2.3221106842 | 6.4262669425  | 1.9022545269 |
| Cl | 5.2824073299 | 8.2413569098  | 5.4381632220 |
| Cl | 1.7341913160 | 0.1369009661  | 0.0000000000 |
| Cl | 8.7922636521 | 13.5862204373 | 0.0000000000 |
| Cl | 4.9617337185 | 5.1808981852  | 3.6942970000 |
| Cl | 2.4641700775 | 9.4074621722  | 3.6942970000 |

## **2% Tensile Strain**

### **Along z-axis**

|    |              |               |               |
|----|--------------|---------------|---------------|
| Sn | 0.0000000000 | 0.0000000000  | -0.0772074964 |
| Sn | 3.7514610000 | 7.3467290000  | 3.7318314742  |
| H  | 0.5656837889 | 9.7948962058  | 0.8331280227  |
| H  | 6.9146569363 | 4.9069927547  | 6.5709253053  |
| H  | 6.9372372111 | 4.8985617942  | 0.8331280227  |
| H  | 0.5882640637 | 9.7864652453  | 6.5709253053  |
| H  | 4.3265480809 | 12.2437309065 | 2.8152032025  |
| H  | 3.1728186557 | 2.4383430011  | 4.6127101310  |
| H  | 3.1763729191 | 2.4497270935  | 2.8152032025  |
| H  | 4.3301023443 | 12.2551149989 | 4.6127101310  |
| H  | 1.0343491055 | 1.3259534832  | 2.8828014003  |
| H  | 6.4676888746 | 13.3756699411 | 4.5317652258  |
| H  | 6.4685718945 | 13.3675045168 | 2.8828014003  |
| H  | 1.0352321254 | 1.3177880589  | 4.5317652258  |
| H  | 4.7936578320 | 6.0096877644  | 0.7960018220  |
| H  | 2.7234539498 | 8.6505183906  | 6.6845567110  |
| H  | 2.7092631680 | 8.6837702356  | 0.7960018220  |
| H  | 4.7794670502 | 6.0429396094  | 6.6845567110  |
| H  | 1.0457636397 | 3.7617306719  | 2.8258473498  |
| H  | 6.4639846399 | 10.9453650997 | 4.6138065354  |
| H  | 6.4571573603 | 10.9317273281 | 2.8258473498  |
| H  | 1.0389363601 | 3.7480929003  | 4.6138065354  |

|    |              |               |               |
|----|--------------|---------------|---------------|
| H  | 4.7777262805 | 3.5827378947  | 0.8271569151  |
| H  | 2.6954955795 | 11.0900257126 | 6.5747247820  |
| H  | 2.7251947195 | 11.1107201053 | 0.8271569151  |
| H  | 4.8074254205 | 3.6034322874  | 6.5747247820  |
| H  | 0.3711893663 | 11.6002423477 | 3.7107221613  |
| H  | 7.1317316337 | 3.0932156523  | 3.7107211613  |
| H  | 4.1222505949 | 10.4393093829 | -0.0848929902 |
| H  | 3.3806704051 | 4.2541486171  | -0.0848929902 |
| H  | 0.5299558549 | 8.2428819924  | -0.0611436648 |
| H  | 6.9729651451 | 6.4505760076  | -0.0611436648 |
| H  | 4.2819750374 | 13.7990259421 | 3.7057486680  |
| H  | 3.2209459626 | 0.8944320579  | 3.7057486680  |
| C  | 0.7145515147 | 3.2159793217  | 3.7146727435  |
| C  | 6.7883694853 | 11.4774786783 | 3.7146717435  |
| C  | 4.4659010105 | 4.1318210293  | -0.0662463439 |
| C  | 3.0370199895 | 10.5616369707 | -0.0662463439 |
| C  | 0.9099549957 | 9.2656729853  | -0.0593704859 |
| C  | 6.5929660043 | 5.4277850147  | -0.0593704859 |
| C  | 4.6611249892 | 12.7754434478 | 3.7101414547  |
| C  | 2.8417960108 | 1.9180145522  | 3.7101414547  |
| N  | 1.3518186664 | 1.8663877000  | 3.7092494679  |
| N  | 6.1511023336 | 12.8270703000 | 3.7092484679  |
| N  | 5.1032346365 | 5.4810541192  | -0.0416527618 |
| N  | 2.3996863635 | 9.2124038808  | -0.0416527618 |
| Cl | 1.4646785879 | 13.7754694536 | 1.6977510435  |
| Cl | 6.0326147952 | 0.9040025476  | 5.6797899221  |
| Cl | 6.0382424121 | 0.9179885464  | 1.6977510435  |
| Cl | 1.4703062048 | 13.7894554524 | 5.6797899221  |
| Cl | 5.2197411125 | 8.2583600672  | 1.9570427463  |
| Cl | 2.2864212123 | 6.4388758255  | 5.5137136947  |
| Cl | 2.2831798875 | 6.4350979328  | 1.9570427463  |
| Cl | 5.2164997877 | 8.2545821745  | 5.5137136947  |
| Cl | 1.2769235791 | 2.1146882830  | -0.0849659332 |
| Cl | 6.2259974209 | 12.5787697170 | -0.0849659332 |
| Cl | 5.0343021410 | 5.2341321670  | 3.7251753859  |

|    |              |              |              |
|----|--------------|--------------|--------------|
| Cl | 2.4686188590 | 9.4593258330 | 3.7251753859 |
|----|--------------|--------------|--------------|

**4% Tensile Strain**

**Along x-axis**

|    |               |               |              |
|----|---------------|---------------|--------------|
| Sn | -0.1381908969 | -0.0048774892 | 0.0000000000 |
| Sn | 3.7535877844  | 7.3457947084  | 3.6942970000 |
| H  | 0.5308639880  | 9.7867278665  | 0.8988710498 |
| H  | 6.9754583496  | 4.9044612209  | 6.4897151721 |
| H  | 6.9754583496  | 4.9044612209  | 0.8988778279 |
| H  | 0.5308639880  | 9.7867278665  | 6.4897219502 |
| H  | 4.3669143643  | 12.2223661874 | 2.7954370413 |
| H  | 3.1382806478  | 2.4721606288  | 4.5933632769 |
| H  | 3.1382806478  | 2.4721606288  | 2.7952297231 |
| H  | 4.3669143643  | 12.2223661874 | 4.5931559587 |
| H  | 1.0296863163  | 1.3010313780  | 2.8721126867 |
| H  | 6.4720364612  | 13.4005009354 | 4.5164598381 |
| H  | 6.4720364612  | 13.4005009354 | 2.8721331619 |
| H  | 1.0296863163  | 1.3010313780  | 4.5164803133 |
| H  | 4.8209197699  | 5.9984735887  | 0.8234187663 |
| H  | 2.6849910977  | 8.6918337568  | 6.5652440442 |
| H  | 2.6849910977  | 8.6918337568  | 0.8233489558 |
| H  | 4.8209197699  | 5.9984735887  | 6.5651742337 |
| H  | 0.9697286100  | 3.7412816089  | 2.8002547786 |
| H  | 6.5402363684  | 10.9597017118 | 4.5884584434 |
| H  | 6.5402363684  | 10.9597017118 | 2.8001345566 |
| H  | 0.9697286100  | 3.7412816089  | 4.5883382214 |
| H  | 4.8604494797  | 3.5664063338  | 0.8944741680 |
| H  | 2.6464966795  | 11.1241907131 | 6.4942549888 |
| H  | 2.6464966795  | 11.1241907131 | 0.8943380112 |
| H  | 4.8604494797  | 3.5664063338  | 6.4941188320 |
| H  | 0.1305424166  | 11.6630771096 | 3.6942970000 |
| H  | 7.3772178160  | 3.0418085879  | 3.6942960000 |
| H  | 4.0681008913  | 10.4777709448 | 0.0000000000 |
| H  | 3.4386186292  | 4.2120626964  | 0.0000000000 |
| H  | 0.5036257411  | 8.2345161313  | 0.0000000000 |

|    |              |               |              |
|----|--------------|---------------|--------------|
| H  | 7.0022446052 | 6.4566011651  | 0.0000000000 |
| H  | 4.2899634294 | 13.7707160317 | 3.6942970000 |
| H  | 3.2119771728 | 0.9235888247  | 3.6942970000 |
| C  | 0.6566934997 | 3.1937282932  | 3.6942970000 |
| C  | 6.8515180251 | 11.5080125291 | 3.6942960000 |
| C  | 4.5261091018 | 4.1008229478  | 0.0000000000 |
| C  | 2.9806585615 | 10.5894523271 | 0.0000000000 |
| C  | 0.8690620722 | 9.2637488550  | 0.0000000000 |
| C  | 6.6370552039 | 5.4272967342  | 0.0000000000 |
| C  | 4.6893852328 | 12.7544651766 | 3.6942970000 |
| C  | 2.8150516526 | 1.9409207476  | 3.6942970000 |
| N  | 1.3271393257 | 1.8604998587  | 3.6942970000 |
| N  | 6.1771015105 | 12.8392153927 | 3.6942960000 |
| N  | 5.1461186245 | 5.4580117850  | 0.0000000000 |
| N  | 2.3600363506 | 9.2325169318  | 0.0000000000 |
| Cl | 1.3604494234 | 13.8113585370 | 1.7620507326 |
| Cl | 6.1635238352 | 0.8758901400  | 5.6294943053 |
| Cl | 6.1635238352 | 0.8758901400  | 1.7590986947 |
| Cl | 1.3604494234 | 13.8113585370 | 5.6265422674 |
| Cl | 5.2178508980 | 8.2758057383  | 1.9324692135 |
| Cl | 2.2888819461 | 6.4150100008  | 5.4563508343 |
| Cl | 2.2888819461 | 6.4150100008  | 1.9322421657 |
| Cl | 5.2178508980 | 8.2758057383  | 5.4561237865 |
| Cl | 1.0951596414 | 2.1407234642  | 0.0000000000 |
| Cl | 6.4247657757 | 12.5477451070 | 0.0000000000 |
| Cl | 5.0615718860 | 5.2410376465  | 3.6942970000 |
| Cl | 2.4445984768 | 9.4498958001  | 3.6942970000 |

**4% Tensile Strain**

**Along y-axis**

|    |               |               |              |
|----|---------------|---------------|--------------|
| Sn | -0.1684900969 | -0.2954706457 | 0.0000000000 |
| Sn | 3.7564431201  | 7.3716634640  | 3.6942970000 |
| H  | 0.5242960048  | 9.8036452894  | 0.9001739405 |
| H  | 6.9793342888  | 4.8948617838  | 6.4884843520 |

|   |              |               |              |
|---|--------------|---------------|--------------|
| H | 6.9793342888 | 4.8948617838  | 0.9001086480 |
| H | 0.5242960048 | 9.8036452894  | 6.4884190595 |
| H | 4.4640109715 | 12.5541011303 | 2.7942330619 |
| H | 3.0473242939 | 2.1506462115  | 4.5940577618 |
| H | 3.0473242939 | 2.1506462115  | 2.7945352382 |
| H | 4.4640109715 | 12.5541011303 | 4.5943599381 |
| H | 0.8769617808 | 1.0865075404  | 2.8703622956 |
| H | 6.6317026760 | 13.6203527069 | 4.5183638984 |
| H | 6.6317026760 | 13.6203527069 | 2.8702291016 |
| H | 0.8769617808 | 1.0865075404  | 4.5182307044 |
| H | 4.7923461979 | 5.9262687146  | 0.8240122139 |
| H | 2.7065593456 | 8.7641339371  | 6.5650427504 |
| H | 2.7065593456 | 8.7641339371  | 0.8235502496 |
| H | 4.7923461979 | 5.9262687146  | 6.5645807861 |
| H | 0.9346229796 | 3.5182840840  | 2.7983037270 |
| H | 6.5792506822 | 11.1892598244 | 4.5907197949 |
| H | 6.5792506822 | 11.1892598244 | 2.7978732051 |
| H | 0.9346229796 | 3.5182840840  | 4.5902892730 |
| H | 4.8979995541 | 3.4987069707  | 0.8956397724 |
| H | 2.6138654945 | 11.1934987206 | 6.4926695961 |
| H | 2.6138654945 | 11.1934987206 | 0.8959234039 |
| H | 4.8979995541 | 3.4987069707  | 6.4929532276 |
| H | 0.1497456327 | 11.8299070771 | 3.6942970000 |
| H | 7.3625701723 | 2.8799081720  | 3.6942960000 |
| H | 4.0475617809 | 10.5798467716 | 0.0000000000 |
| H | 3.4607171852 | 4.1051052121  | 0.0000000000 |
| H | 0.5361770333 | 8.2526098928  | 0.0000000000 |
| H | 6.9647631831 | 6.4461073392  | 0.0000000000 |
| H | 4.4617492041 | 14.1065661651 | 3.6942970000 |
| H | 3.0473210575 | 0.5976875482  | 3.6942970000 |
| C | 0.5994740586 | 2.9866415495  | 3.6942970000 |
| C | 6.9131512160 | 11.7209822660 | 3.6942960000 |
| C | 4.5513784817 | 4.0235664450  | 0.0000000000 |
| C | 2.9574844846 | 10.6671339031 | 0.0000000000 |
| C | 0.8755124576 | 9.2909032637  | 0.0000000000 |

|    |              |               |              |
|----|--------------|---------------|--------------|
| C  | 6.6272959514 | 5.4071579237  | 0.0000000000 |
| C  | 4.8101114709 | 13.0708411607 | 3.6942970000 |
| C  | 2.7003249069 | 1.6338427313  | 3.6942970000 |
| N  | 1.2080762347 | 1.6234177740  | 3.6942970000 |
| N  | 6.3020723291 | 13.0829299570 | 3.6942960000 |
| N  | 5.1348092543 | 5.3980467247  | 0.0000000000 |
| N  | 2.3675850455 | 9.2958080972  | 0.0000000000 |
| Cl | 1.3028577265 | 14.0648011449 | 1.7630816837 |
| Cl | 6.2106522559 | 0.6262108690  | 5.6278051323 |
| Cl | 6.2106522559 | 0.6262108690  | 1.7607878677 |
| Cl | 1.3028577265 | 14.0648011449 | 5.6255113163 |
| Cl | 5.2183666944 | 8.2977493211  | 1.9293301011 |
| Cl | 2.2934827684 | 6.4389991618  | 5.4570340839 |
| Cl | 2.2934827684 | 6.4389991618  | 1.9315589161 |
| Cl | 5.2183666944 | 8.2977493211  | 5.4592628989 |
| Cl | 1.1223673604 | 1.8229742452  | 0.0000000000 |
| Cl | 6.3913915952 | 12.8698617239 | 0.0000000000 |
| Cl | 5.0547427562 | 5.2542164781  | 3.6942970000 |
| Cl | 2.4516456953 | 9.4852429394  | 3.6942970000 |

#### **4% Tensile Strain**

##### **Along z-axis**

|    |               |               |               |
|----|---------------|---------------|---------------|
| Sn | -0.1561260713 | -0.0080599962 | -0.1394743156 |
| Sn | 3.7532923280  | 7.3455271384  | 3.7549324263  |
| H  | 0.5458447032  | 9.7537376560  | 0.7743956623  |
| H  | 6.9267771422  | 4.9575902502  | 6.6629109919  |
| H  | 6.9623186048  | 4.9410770923  | 0.7747360125  |
| H  | 0.5811273358  | 9.7364804518  | 6.6628652877  |
| H  | 4.3965496699  | 12.2442634395 | 2.8244833384  |
| H  | 3.1086191380  | 2.4287415949  | 4.6222694202  |
| H  | 3.1048706786  | 2.4499973507  | 2.8258375999  |
| H  | 4.3927380300  | 12.2673447363 | 4.6210348202  |
| H  | 1.0032100282  | 1.2558349724  | 2.8917566933  |
| H  | 6.4895689641  | 13.4632438672 | 4.5363540579  |
| H  | 6.4934337503  | 13.4453554294 | 2.8877770600  |

|    |              |               |               |
|----|--------------|---------------|---------------|
| H  | 1.0067494664 | 1.2426836274  | 4.5404327025  |
| H  | 4.8019205575 | 6.0088952116  | 0.7658798399  |
| H  | 2.7295829001 | 8.6160186267  | 6.8000729803  |
| H  | 2.7039805622 | 8.6803268993  | 0.7656876415  |
| H  | 4.7758841787 | 6.0730679083  | 6.7999325770  |
| H  | 0.9430095552 | 3.7011198641  | 2.8451703479  |
| H  | 6.5754223609 | 11.0240116268 | 4.6343124926  |
| H  | 6.5652117416 | 10.9992337995 | 2.8464200799  |
| H  | 0.9308806172 | 3.6817064617  | 4.6331682561  |
| H  | 4.8049620616 | 3.5893372594  | 0.7635556973  |
| H  | 2.6625369502 | 11.0623244414 | 6.6608389851  |
| H  | 2.7057419444 | 11.0999499557 | 0.7637641149  |
| H  | 4.8475541116 | 3.6276665955  | 6.6603029702  |
| H  | 0.1141963022 | 11.7135409432 | 3.7229594982  |
| H  | 7.3908494258 | 2.9940229054  | 3.7236826142  |
| H  | 4.1038572670 | 10.4319681675 | -0.1516193252 |
| H  | 3.4055228149 | 4.2547348573  | -0.1514058505 |
| H  | 0.5366193001 | 8.1921168747  | -0.1102935158 |
| H  | 6.9676397683 | 6.5020818216  | -0.1103940942 |
| H  | 4.3026692984 | 13.8018936297 | 3.7022718439  |
| H  | 3.1946423234 | 0.8925647585  | 3.7048388188  |
| C  | 0.6231059966 | 3.1435023910  | 3.7311103159  |
| C  | 6.8823923952 | 11.5604377669 | 3.7309507672  |
| C  | 4.4925532822 | 4.1438248530  | -0.1265559472 |
| C  | 3.0170448674 | 10.5450266502 | -0.1264358568 |
| C  | 0.9022991879 | 9.2212881533  | -0.1118437341 |
| C  | 6.6043970684 | 5.4721107264  | -0.1118383910 |
| C  | 4.7138150643 | 12.7908265938 | 3.7163494444  |
| C  | 2.7866835094 | 1.9047647122  | 3.7183492975  |
| N  | 1.2981633127 | 1.8105811472  | 3.7197756769  |
| N  | 6.2018580703 | 12.8903809506 | 3.7168207181  |
| N  | 5.1127182024 | 5.5019341191  | -0.0844804068 |
| N  | 2.3940459679 | 9.1880785465  | -0.0846234690 |
| Cl | 1.3596822703 | 13.8500946447 | 1.6427845713  |
| Cl | 6.1787833968 | 0.8239112154  | 5.7534696474  |

|    |              |               |               |
|----|--------------|---------------|---------------|
| Cl | 6.1770171596 | 0.8416684474  | 1.6341772238  |
| Cl | 1.3634588307 | 13.8540583193 | 5.7654373257  |
| Cl | 5.2203839118 | 8.2603683337  | 1.9709003812  |
| Cl | 2.2929008519 | 6.4387453010  | 5.5531025276  |
| Cl | 2.2865132392 | 6.4292275486  | 1.9705534866  |
| Cl | 5.2141780755 | 8.2508540205  | 5.5524572818  |
| Cl | 1.0169924588 | 2.1668500053  | -0.1451131196 |
| Cl | 6.5164106412 | 12.5148559521 | -0.1402526059 |
| Cl | 5.0372480013 | 5.2342645713  | 3.7443869383  |
| Cl | 2.4689454287 | 9.4554978119  | 3.7444061975  |

**6% Tensile Strain**

**Along x-axis**

|    |               |               |              |
|----|---------------|---------------|--------------|
| Sn | -0.2067671538 | -0.0065284755 | 0.0000000000 |
| Sn | 3.7570879783  | 7.3463339251  | 3.6942970000 |
| H  | 0.5160259087  | 9.7829520981  | 0.8987942934 |
| H  | 6.9882822601  | 4.9090346527  | 6.4897445211 |
| H  | 6.9882822601  | 4.9090346527  | 0.8988484789 |
| H  | 0.5160259087  | 9.7829520981  | 6.4897987066 |
| H  | 4.3774415682  | 12.2175349375 | 2.7956603940 |
| H  | 3.1295707357  | 2.4802594149  | 4.5933020945 |
| H  | 3.1295707357  | 2.4802594149  | 2.7952909055 |
| H  | 4.3774415682  | 12.2175349375 | 4.5929326060 |
| H  | 1.0345562620  | 1.2846015877  | 2.8723656936 |
| H  | 6.4703959759  | 13.4183743357 | 4.5162604746 |
| H  | 6.4703959759  | 13.4183743357 | 2.8723325254 |
| H  | 1.0345562620  | 1.2846015877  | 4.5162273064 |
| H  | 4.8270775830  | 5.9910766333  | 0.8235026446 |
| H  | 2.6753613674  | 8.6972470118  | 6.5651836051 |
| H  | 2.6753613674  | 8.6972470118  | 0.8234093949 |
| H  | 4.8270775830  | 5.9910766333  | 6.5650903554 |
| H  | 0.9467677822  | 3.7276096989  | 2.8000782614 |
| H  | 6.5648961013  | 10.9746989609 | 4.5885911595 |
| H  | 6.5648961013  | 10.9746989609 | 2.8000018405 |
| H  | 0.9467677822  | 3.7276096989  | 4.5885147386 |

|    |               |               |              |
|----|---------------|---------------|--------------|
| H  | 4.8778398103  | 3.5596825436  | 0.8948055290 |
| H  | 2.6298200241  | 11.1294025967 | 6.4940198987 |
| H  | 2.6298200241  | 11.1294025967 | 0.8945731013 |
| H  | 4.8778398103  | 3.5596825436  | 6.4937874710 |
| H  | -0.0019245432 | 11.6920178362 | 3.6942970000 |
| H  | 7.5120570857  | 3.0128365586  | 3.6942960000 |
| H  | 4.0530536422  | 10.4862253010 | 0.0000000000 |
| H  | 3.4533335282  | 4.1995148675  | 0.0000000000 |
| H  | 0.4968766847  | 8.2295163365  | 0.0000000000 |
| H  | 7.0055824940  | 6.4623519369  | 0.0000000000 |
| H  | 4.2887589913  | 13.7654875375 | 3.6942970000 |
| H  | 3.2175331920  | 0.9320623202  | 3.6942970000 |
| C  | 0.6398990044  | 3.1768603244  | 3.6942970000 |
| C  | 6.8706655266  | 11.5259701200 | 3.6942960000 |
| C  | 4.5415032689  | 4.0924375166  | 0.0000000000 |
| C  | 2.9651028507  | 10.5956474215 | 0.0000000000 |
| C  | 0.8566529475  | 9.2610835598  | 0.0000000000 |
| C  | 6.6470551698  | 5.4304132707  | 0.0000000000 |
| C  | 4.6966202958  | 12.7523586466 | 3.6942970000 |
| C  | 2.8109302256  | 1.9457416532  | 3.6942970000 |
| N  | 1.3237808613  | 1.8504490906  | 3.6942970000 |
| N  | 6.1835730590  | 12.8507680543 | 3.6942960000 |
| N  | 5.1554608484  | 5.4526071234  | 0.0000000000 |
| N  | 2.3483317720  | 9.2366459389  | 0.0000000000 |
| Cl | 1.3090952257  | 13.8320104555 | 1.7600546184 |
| Cl | 6.2265190568  | 0.8520913295  | 5.6325613779 |
| Cl | 6.2265190568  | 0.8520913295  | 1.7560316221 |
| Cl | 1.3090952257  | 13.8320104555 | 5.6285383816 |
| Cl | 5.2188648347  | 8.2798093743  | 1.9324160963 |
| Cl | 2.2938421852  | 6.4114771524  | 5.4562566667 |
| Cl | 2.2938421852  | 6.4114771524  | 1.9323363333 |
| Cl | 5.2188648347  | 8.2798093743  | 5.4561769037 |
| Cl | 0.9963540656  | 2.1560811905  | 0.0000000000 |
| Cl | 6.5366971442  | 12.5294886379 | 0.0000000000 |
| Cl | 5.0725808703  | 5.2448702324  | 3.6942970000 |

|    |              |              |              |
|----|--------------|--------------|--------------|
| Cl | 2.4397358279 | 9.4465865086 | 3.6942970000 |
|----|--------------|--------------|--------------|

**6% Tensile Strain**

**Along y-axis**

|    |              |               |              |
|----|--------------|---------------|--------------|
| Sn | 0.0093771871 | -0.4285553435 | 0.0000000000 |
| Sn | 3.7562905790 | 7.3536160455  | 3.6942970000 |
| H  | 0.7852169198 | 9.6704817850  | 0.9022588674 |
| H  | 6.7118830233 | 5.0469396687  | 6.4862230341 |
| H  | 6.7118830233 | 5.0469396687  | 0.9023699659 |
| H  | 0.7852169198 | 9.6704817850  | 6.4863341326 |
| H  | 4.5397716588 | 12.9647931719 | 2.7928861212 |
| H  | 2.9620940975 | 1.7463870904  | 4.5968316094 |
| H  | 2.9620940975 | 1.7463870904  | 2.7917613906 |
| H  | 4.5397716588 | 12.9647931719 | 4.5957068788 |
| H  | 0.5507970944 | 1.3743210039  | 2.8715433274 |
| H  | 6.9528939655 | 13.3310461772 | 4.5169034476 |
| H  | 6.9528939655 | 13.3310461772 | 2.8716895524 |
| H  | 0.5507970944 | 1.3743210039  | 4.5170496726 |
| H  | 4.3843159347 | 5.7536328175  | 0.8215971496 |
| H  | 3.1064221477 | 8.9449111487  | 6.5662741587 |
| H  | 3.1064221477 | 8.9449111487  | 0.8223188413 |
| H  | 4.3843159347 | 5.7536328175  | 6.5669958504 |
| H  | 1.3204426671 | 3.6798148338  | 2.8016403837 |
| H  | 6.1671367967 | 11.0290685930 | 4.5859902622 |
| H  | 6.1671367967 | 11.0290685930 | 2.8026027378 |
| H  | 1.3204426671 | 3.6798148338  | 4.5869526163 |
| H  | 4.8193077425 | 3.3686273384  | 0.8947452304 |
| H  | 2.6900159221 | 11.3322895380 | 6.4938770396 |
| H  | 2.6900159221 | 11.3322895380 | 0.8947159604 |
| H  | 4.8193077425 | 3.3686273384  | 6.4938477696 |
| H  | 0.2068882079 | 11.2295578189 | 3.6942970000 |
| H  | 7.2837911341 | 3.4685111832  | 3.6942960000 |
| H  | 4.1844733079 | 10.8935338080 | 0.0000000000 |
| H  | 3.3217830990 | 3.7958540430  | 0.0000000000 |
| H  | 1.0017274422 | 8.1373471781  | 0.0000000000 |

|    |              |               |              |
|----|--------------|---------------|--------------|
| H  | 6.4818307435 | 6.5777492357  | 0.0000000000 |
| H  | 4.9874221333 | 14.4463727813 | 3.6942970000 |
| H  | 2.5159961100 | 0.2654802789  | 3.6942970000 |
| C  | 0.8537027935 | 3.2529749442  | 3.6942970000 |
| C  | 6.6386902749 | 11.4528188969 | 3.6942960000 |
| C  | 4.4144117764 | 3.8515180536  | 0.0000000000 |
| C  | 3.0916484270 | 10.8464953347 | 0.0000000000 |
| C  | 1.1994030389 | 9.2117084048  | 0.0000000000 |
| C  | 6.2938097596 | 5.5020575348  | 0.0000000000 |
| C  | 5.0205792311 | 13.3544523924 | 3.6942970000 |
| C  | 2.4827217858 | 1.3574056000  | 3.6942970000 |
| N  | 1.0515461569 | 1.7765039077  | 3.6942970000 |
| N  | 6.4509022955 | 12.9309301912 | 3.6942960000 |
| N  | 4.8183055711 | 5.2878784550  | 0.0000000000 |
| N  | 2.6769263212 | 9.4132017451  | 0.0000000000 |
| Cl | 1.3307222928 | 13.9842069391 | 1.7489125675 |
| Cl | 6.1928172457 | 0.7370865066  | 5.6429626239 |
| Cl | 6.1928172457 | 0.7370865066  | 1.7456303761 |
| Cl | 1.3307222928 | 13.9842069391 | 5.6396804325 |
| Cl | 5.1662344275 | 8.3778800513  | 1.9355419684 |
| Cl | 2.3444610348 | 6.3379371010  | 5.4562196384 |
| Cl | 2.3444610348 | 6.3379371010  | 1.9323733616 |
| Cl | 5.1662344275 | 8.3778800513  | 5.4530510316 |
| Cl | 1.5833682003 | 1.4681739087  | 0.0000000000 |
| Cl | 5.9396640715 | 13.2470765564 | 0.0000000000 |
| Cl | 5.1556448686 | 5.3191834657  | 3.6942970000 |
| Cl | 2.3632785420 | 9.3928590511  | 3.6942970000 |

### **6% Tensile Strain**

#### **Along z-axis**

|    |              |              |               |
|----|--------------|--------------|---------------|
| Sn | 0.0000000000 | 0.0000000000 | -0.1923719586 |
| Sn | 3.7514610000 | 7.3467290000 | 3.7788371452  |
| H  | 0.6507860131 | 9.7888487530 | 0.7086723543  |
| H  | 6.8444674599 | 4.9920346668 | 6.7455818603  |
| H  | 6.8521349869 | 4.9046092470 | 0.7086723543  |

|   |              |               |               |
|---|--------------|---------------|---------------|
| H | 0.6584535401 | 9.7014233332  | 6.7455818603  |
| H | 4.4116586251 | 12.2857579778 | 2.8359392256  |
| H | 3.0927365172 | 2.3882826608  | 4.6329406876  |
| H | 3.0912623749 | 2.4077000222  | 2.8359392256  |
| H | 4.4101844828 | 12.3051753392 | 4.6329406876  |
| H | 0.9544390211 | 1.2757233323  | 2.9005652765  |
| H | 6.5502801801 | 13.4335642092 | 4.5540102870  |
| H | 6.5484819789 | 13.4177346677 | 2.9005652765  |
| H | 0.9526408199 | 1.2598937908  | 4.5540102870  |
| H | 4.7147983771 | 6.0595788577  | 0.6881217985  |
| H | 2.7935346974 | 8.5937995637  | 6.8667293692  |
| H | 2.7881226229 | 8.6338791423  | 0.6881217985  |
| H | 4.7093863026 | 6.0996584363  | 6.8667293692  |
| H | 0.9521579451 | 3.7126405126  | 2.8594760743  |
| H | 6.5541103122 | 11.0063797416 | 4.6481199985  |
| H | 6.5507630549 | 10.9808174874 | 2.8594760743  |
| H | 0.9488106878 | 3.6870782584  | 4.6481199985  |
| H | 4.7052418407 | 3.6203699830  | 0.6899741524  |
| H | 2.8175939467 | 11.0189084298 | 6.7346810547  |
| H | 2.7976791593 | 11.0730880170 | 0.6899741524  |
| H | 4.6853270533 | 3.6745495702  | 6.7346810547  |
| H | 0.4585182570 | 11.6622438640 | 3.7450685416  |
| H | 7.0444027430 | 3.0312141360  | 3.7450675416  |
| H | 4.2121712533 | 10.3673626434 | -0.1672142169 |
| H | 3.2907497467 | 4.3260953566  | -0.1672142169 |
| H | 0.6041255384 | 8.1959496448  | -0.1122113978 |
| H | 6.8987954616 | 6.4975083552  | -0.1122113978 |
| H | 4.3591618361 | 13.8453849833 | 3.7185005794  |
| H | 3.1437591639 | 0.8480730167  | 3.7185005794  |
| C | 0.6263897934 | 3.1593110980  | 3.7457890673  |
| C | 6.8765312066 | 11.5341469020 | 3.7457880673  |
| C | 4.3749876485 | 4.1905899464  | -0.1836518384 |
| C | 3.1279333515 | 10.5028680536 | -0.1836518384 |
| C | 0.9858781333 | 9.2178838611  | -0.1616734731 |
| C | 6.5170428667 | 5.4755741389  | -0.1616734731 |

|    |              |               |               |
|----|--------------|---------------|---------------|
| C  | 4.7421924989 | 12.8232732088 | 3.7294622365  |
| C  | 2.7607285011 | 1.8701847912  | 3.7294622365  |
| N  | 1.2699845820 | 1.8112010047  | 3.7321014518  |
| N  | 6.2329364180 | 12.8822569953 | 3.7321004518  |
| N  | 5.0260934470 | 5.5352584862  | -0.1524372839 |
| N  | 2.4768275530 | 9.1581995138  | -0.1524372839 |
| Cl | 1.4736578250 | 13.8021122503 | 1.6064242505  |
| Cl | 6.0561486486 | 0.9205857125  | 5.8302154698  |
| Cl | 6.0292631750 | 0.8913457497  | 1.6064242505  |
| Cl | 1.4467723514 | 13.7728722875 | 5.8302154698  |
| Cl | 5.2038730577 | 8.2568892312  | 1.9726589892  |
| Cl | 2.2830800085 | 6.4468075417  | 5.5786614452  |
| Cl | 2.2990479423 | 6.4365687688  | 1.9726589892  |
| Cl | 5.2198409915 | 8.2466504583  | 5.5786614452  |
| Cl | 1.2688484397 | 2.1144678761  | -0.1970541962 |
| Cl | 6.2340725603 | 12.5789901239 | -0.1970541962 |
| Cl | 5.0140492973 | 5.2307742296  | 3.7789901430  |
| Cl | 2.4888717027 | 9.4626837704  | 3.7789901430  |

## **2% Compressive Strain**

### **Along x-axis**

|    |              |               |              |
|----|--------------|---------------|--------------|
| Sn | 0.0752905443 | 0.0030858300  | 0.0000000000 |
| Sn | 3.7504839699 | 7.3468168034  | 3.6942970000 |
| H  | 0.6069839313 | 9.8236621752  | 0.8990389116 |
| H  | 6.8943941942 | 4.8717791492  | 6.4895468303 |
| H  | 6.8943941942 | 4.8717791492  | 0.8990461697 |
| H  | 0.6069839313 | 9.8236621752  | 6.4895540884 |
| H  | 4.2924808566 | 12.2378886039 | 2.7940961350 |
| H  | 3.2069752615 | 2.4548600446  | 4.5944756636 |
| H  | 3.2069752615 | 2.4548600446  | 2.7941173364 |
| H  | 4.2924808566 | 12.2378886039 | 4.5944968650 |
| H  | 1.0513125599 | 1.3644433549  | 2.8718233370 |
| H  | 6.4508997071 | 13.3232986888 | 4.5169305424 |
| H  | 6.4508997071 | 13.3232986888 | 2.8716624576 |
| H  | 1.0513125599 | 1.3644433549  | 4.5167696630 |

|    |              |               |              |
|----|--------------|---------------|--------------|
| H  | 4.7631997016 | 6.0081524205  | 0.8230974107 |
| H  | 2.7383255011 | 8.6874833159  | 6.5655122404 |
| H  | 2.7383255011 | 8.6874833159  | 0.8230807596 |
| H  | 4.7631997016 | 6.0081524205  | 6.5654955893 |
| H  | 1.0802336072 | 3.7936513443  | 2.8010629055 |
| H  | 6.4161643723 | 10.8943383735 | 4.5874530698 |
| H  | 6.4161643723 | 10.8943383735 | 2.8011399302 |
| H  | 1.0802336072 | 3.7936513443  | 4.5875300945 |
| H  | 4.7568207883 | 3.5766374522  | 0.8936743808 |
| H  | 2.7442752690 | 11.1189514440 | 6.4948910117 |
| H  | 2.7442752690 | 11.1189514440 | 0.8937019883 |
| H  | 4.7568207883 | 3.5766374522  | 6.4949186192 |
| H  | 0.4805470344 | 11.5510171304 | 3.6942970000 |
| H  | 7.0176214342 | 3.1336215912  | 3.6942960000 |
| H  | 4.1527492021 | 10.4464675319 | 0.0000000000 |
| H  | 3.3484448785 | 4.2495852350  | 0.0000000000 |
| H  | 0.5458551059 | 8.2756476302  | 0.0000000000 |
| H  | 6.9555668310 | 6.4198274126  | 0.0000000000 |
| H  | 4.2710241773 | 13.7854317715 | 3.6942970000 |
| H  | 3.2320637039 | 0.9075381462  | 3.6942970000 |
| C  | 0.7506192981 | 3.2551742868  | 3.6942970000 |
| C  | 6.7470008180 | 11.4321145450 | 3.6942960000 |
| C  | 4.4328065557 | 4.1180371520  | 0.0000000000 |
| C  | 3.0684111193 | 10.5776242709 | 0.0000000000 |
| C  | 0.9346207168 | 9.2954231552  | 0.0000000000 |
| C  | 6.5668060719 | 5.4000639096  | 0.0000000000 |
| C  | 4.6328203873 | 12.7561066148 | 3.6942970000 |
| C  | 2.8677293696 | 1.9361569563  | 3.6942970000 |
| N  | 1.3789299090 | 1.9032321181  | 3.6942970000 |
| N  | 6.1218466641 | 12.7856550883 | 3.6942960000 |
| N  | 5.0786610321 | 5.4620013117  | 0.0000000000 |
| N  | 2.4227270632 | 9.2335973555  | 0.0000000000 |
| Cl | 1.5249937926 | 13.7537363983 | 1.7641094220 |
| Cl | 5.9720754158 | 0.9435909119  | 5.6280117299 |
| Cl | 5.9720754158 | 0.9435909119  | 1.7605812701 |

|    |              |               |              |
|----|--------------|---------------|--------------|
| Cl | 1.5249937926 | 13.7537363983 | 5.6244835780 |
| Cl | 5.2199518780 | 8.2618041249  | 1.9308863437 |
| Cl | 2.2806173159 | 6.4328383222  | 5.4576185742 |
| Cl | 2.2806173159 | 6.4328383222  | 1.9309744258 |
| Cl | 5.2199518780 | 8.2618041249  | 5.4577066563 |
| Cl | 1.3797789160 | 2.1026788999  | 0.0000000000 |
| Cl | 6.1197537753 | 12.5976538750 | 0.0000000000 |
| Cl | 5.0272525042 | 5.2315780190  | 3.6942970000 |
| Cl | 2.4744296132 | 9.4631841107  | 3.6942970000 |

**2% Compressive Strain**

**Along y-axis**

|    |              |               |              |
|----|--------------|---------------|--------------|
| Sn | 0.0023022004 | 0.1586819021  | 0.0000000000 |
| Sn | 3.7516057448 | 7.3420978126  | 3.6942970000 |
| H  | 0.5562244310 | 9.8006182412  | 0.8986470551 |
| H  | 6.9495727074 | 4.8886150162  | 6.4903156490 |
| H  | 6.9495727074 | 4.8886150162  | 0.8982773510 |
| H  | 0.5562244310 | 9.8006182412  | 6.4899459449 |
| H  | 4.2870985584 | 12.0582156358 | 2.7965116989 |
| H  | 3.2130192245 | 2.6251340555  | 4.5921218227 |
| H  | 3.2130192245 | 2.6251340555  | 2.7964711773 |
| H  | 4.2870985584 | 12.0582156358 | 4.5920813011 |
| H  | 1.0859823382 | 1.4724135085  | 2.8720377746 |
| H  | 6.4127942378 | 13.2139338380 | 4.5166958991 |
| H  | 6.4127942378 | 13.2139338380 | 2.8718971009 |
| H  | 1.0859823382 | 1.4724135085  | 4.5165552254 |
| H  | 4.8220086232 | 6.0290106317  | 0.8231562360 |
| H  | 2.6804542745 | 8.6533223317  | 6.5657740700 |
| H  | 2.6804542745 | 8.6533223317  | 0.8228189300 |
| H  | 4.8220086232 | 6.0290106317  | 6.5654367640 |
| H  | 1.0678970579 | 3.9062742061  | 2.8013132611 |
| H  | 6.4313302329 | 10.7800367270 | 4.5870088624 |
| H  | 6.4313302329 | 10.7800367270 | 2.8015841376 |
| H  | 1.0678970579 | 3.9062742061  | 4.5872797389 |

|    |              |               |              |
|----|--------------|---------------|--------------|
| H  | 4.8122103756 | 3.5954189506  | 0.8928851752 |
| H  | 2.6972268274 | 11.0871993166 | 6.4952109806 |
| H  | 2.6972268274 | 11.0871993166 | 0.8933820194 |
| H  | 4.8122103756 | 3.5954189506  | 6.4957078248 |
| H  | 0.3336663583 | 11.4645948961 | 3.6942970000 |
| H  | 7.1662404341 | 3.2220368669  | 3.6942960000 |
| H  | 4.1037752085 | 10.4100778640 | 0.0000000000 |
| H  | 3.4029953508 | 4.2694028681  | 0.0000000000 |
| H  | 0.4904582785 | 8.2517320612  | 0.0000000000 |
| H  | 7.0106706171 | 6.4385401064  | 0.0000000000 |
| H  | 4.2087287286 | 13.6060724336 | 3.6942970000 |
| H  | 3.2874144712 | 1.0774627170  | 3.6942970000 |
| C  | 0.7463990898 | 3.3619093654  | 3.6942970000 |
| C  | 6.7533611903 | 11.3247603637 | 3.6942960000 |
| C  | 4.4872413453 | 4.1376529130  | 0.0000000000 |
| C  | 3.0198664526 | 10.5444955621 | 0.0000000000 |
| C  | 0.8818366369 | 9.2705202719  | 0.0000000000 |
| C  | 6.6224007781 | 5.4182640179  | 0.0000000000 |
| C  | 4.6106984851 | 12.5913279881 | 3.6942970000 |
| C  | 2.8879758616 | 2.0933448580  | 3.6942970000 |
| N  | 1.3994711464 | 2.0210901899  | 3.6942970000 |
| N  | 6.0994032045 | 12.6657145953 | 3.6942960000 |
| N  | 5.1342415336 | 5.4809365222  | 0.0000000000 |
| N  | 2.3698386510 | 9.2026967649  | 0.0000000000 |
| Cl | 1.4572760039 | 13.6179191326 | 1.7642333545 |
| Cl | 6.0507434637 | 1.0962175885  | 5.6251283167 |
| Cl | 6.0507434637 | 1.0962175885  | 1.7634646833 |
| Cl | 1.4572760039 | 13.6179191326 | 5.6243596455 |
| Cl | 5.2158641152 | 8.2648072221  | 1.9286838749 |
| Cl | 2.2874334813 | 6.4173869368  | 5.4606100492 |
| Cl | 2.2874334813 | 6.4173869368  | 1.9279829508 |
| Cl | 5.2158641152 | 8.2648072221  | 5.4599091251 |
| Cl | 1.3311935209 | 2.2406614127  | 0.0000000000 |
| Cl | 6.1738543733 | 12.4741509688 | 0.0000000000 |
| Cl | 5.0541366100 | 5.2446935666  | 3.6942970000 |

|    |              |              |              |
|----|--------------|--------------|--------------|
| Cl | 2.4492008223 | 9.4375874339 | 3.6942970000 |
|----|--------------|--------------|--------------|

**2% Compressive Strain**

**Along z-axis**

|    |              |               |              |
|----|--------------|---------------|--------------|
| Sn | 0.0000000000 | 0.0000000000  | 0.0771966117 |
| Sn | 3.7514610000 | 7.3467290000  | 3.6621547032 |
| H  | 0.5460373930 | 9.8312861335  | 0.9649137924 |
| H  | 6.9778439663 | 4.8457123418  | 6.4093157842 |
| H  | 6.9568836070 | 4.8621718665  | 0.9649137924 |
| H  | 0.5250770337 | 9.8477456582  | 6.4093157842 |
| H  | 4.2906405875 | 12.2069893392 | 2.7728177620 |
| H  | 3.2205657935 | 2.4994826976  | 4.5705733330 |
| H  | 3.2122804125 | 2.4864686608  | 2.7728177620 |
| H  | 4.2823552065 | 12.1939753024 | 4.5705733330 |
| H  | 1.0724615081 | 1.3733933301  | 2.8644733093 |
| H  | 6.4287808370 | 13.3066101761 | 4.5090875694 |
| H  | 6.4304594919 | 13.3200646699 | 2.8644733093 |
| H  | 1.0741401630 | 1.3868478239  | 4.5090875694 |
| H  | 4.8181540901 | 5.9808999805  | 0.8531337735 |
| H  | 2.6726348648 | 8.7418862727  | 6.4489255982 |
| H  | 2.6847669099 | 8.7125580195  | 0.8531337735 |
| H  | 4.8302861352 | 5.9515717273  | 6.4489255982 |
| H  | 1.0915460103 | 3.8019505116  | 2.7718946232 |
| H  | 6.4043769398 | 10.8726268087 | 4.5587385428 |
| H  | 6.4113749897 | 10.8915074884 | 2.7718946232 |
| H  | 1.0985440602 | 3.8208311913  | 4.5587385428 |
| H  | 4.8553390952 | 3.5473278059  | 0.9615568450 |
| H  | 2.6647591021 | 11.1703424962 | 6.4165966513 |
| H  | 2.6475819048 | 11.1461301941 | 0.9615568450 |
| H  | 4.8381618979 | 3.5231155038  | 6.4165966513 |
| H  | 0.3221762385 | 11.5384770024 | 3.6770774583 |
| H  | 7.1807447615 | 3.1549809976  | 3.6770764583 |
| H  | 4.0733358355 | 10.5015757220 | 0.0755199696 |
| H  | 3.4295851645 | 4.1918822780  | 0.0755199696 |
| H  | 0.4906970566 | 8.2899142533  | 0.0547807296 |

|    |              |               |              |
|----|--------------|---------------|--------------|
| H  | 7.0122239434 | 6.4035437467  | 0.0547807296 |
| H  | 4.2420902186 | 13.7498525366 | 3.6817233386 |
| H  | 3.2608307814 | 0.9436054634  | 3.6817233386 |
| C  | 0.7639694960 | 3.2737452325  | 3.6722507297 |
| C  | 6.7389515040 | 11.4197127675 | 3.6722497297 |
| C  | 4.5155405850 | 4.0733292303  | 0.0641858007 |
| C  | 2.9873804150 | 10.6201287697 | 0.0641858007 |
| C  | 0.8688439629 | 9.3139890515  | 0.0577130151 |
| C  | 6.6340770371 | 5.3794689485  | 0.0577130151 |
| C  | 4.6196646882 | 12.7256687187 | 3.6769838335 |
| C  | 2.8832563118 | 1.9677892813  | 3.6769838335 |
| N  | 1.3943317373 | 1.9228692461  | 3.6823307585 |
| N  | 6.1085892627 | 12.7705887539 | 3.6823297585 |
| N  | 5.1453155373 | 5.4243295966  | 0.0424935515 |
| N  | 2.3576054627 | 9.2691284034  | 0.0424935515 |
| Cl | 1.4678247122 | 13.7727367145 | 1.8305276651 |
| Cl | 6.0404493186 | 0.9382289347  | 5.5710917134 |
| Cl | 6.0350962878 | 0.9207212855  | 1.8305276651 |
| Cl | 1.4624716814 | 13.7552290653 | 5.5710917134 |
| Cl | 5.2156567745 | 8.2764201762  | 1.9090279159 |
| Cl | 2.2821658349 | 6.4108231765  | 5.4063669309 |
| Cl | 2.2872642255 | 6.4170378238  | 1.9090279159 |
| Cl | 5.2207551651 | 8.2826348235  | 5.4063669309 |
| Cl | 1.3084058518 | 2.1050853384  | 0.0782786898 |
| Cl | 6.1945151482 | 12.5883726616 | 0.0782786898 |
| Cl | 5.0549465453 | 5.2417387413  | 3.6696191580 |
| Cl | 2.4479744547 | 9.4517192587  | 3.6696191580 |

#### **4% Compressive Strain**

##### **Along x-axis**

|    |              |              |              |
|----|--------------|--------------|--------------|
| Sn | 0.1657159239 | 0.0053454766 | 0.0000000000 |
| Sn | 3.7522340847 | 7.3458014088 | 3.6942970000 |
| H  | 0.6390341339 | 9.8494013224 | 0.8986025375 |
| H  | 6.8555352873 | 4.8465472792 | 6.4899676254 |
| H  | 6.8555352873 | 4.8465472792 | 0.8986253746 |

|   |              |               |              |
|---|--------------|---------------|--------------|
| H | 0.6390341339 | 9.8494013224  | 6.4899904625 |
| H | 4.2543118691 | 12.2349861318 | 2.7947396582 |
| H | 3.2349879865 | 2.4584344364  | 4.5939899156 |
| H | 3.2349879865 | 2.4584344364  | 2.7946030844 |
| H | 4.2543118691 | 12.2349861318 | 4.5938533418 |
| H | 1.0709886088 | 1.3827451663  | 2.8723859518 |
| H | 6.4212587552 | 13.3021007062 | 4.5165152034 |
| H | 6.4212587552 | 13.3021007062 | 2.8720777966 |
| H | 1.0709886088 | 1.3827451663  | 4.5162070482 |
| H | 4.7398135141 | 6.0105164142  | 0.8230803116 |
| H | 2.7547677983 | 8.6857784488  | 6.5654667238 |
| H | 2.7547677983 | 8.6857784488  | 0.8231262762 |
| H | 4.7398135141 | 6.0105164142  | 6.5655126884 |
| H | 1.1182786700 | 3.8089371488  | 2.8004448669 |
| H | 6.3641849197 | 10.8746214949 | 4.5877461617 |
| H | 6.3641849197 | 10.8746214949 | 2.8008468383 |
| H | 1.1182786700 | 3.8089371488  | 4.5881481331 |
| H | 4.7174240001 | 3.5793365340  | 0.8933513621 |
| H | 2.7762779289 | 11.1174427822 | 6.4954182711 |
| H | 2.7762779289 | 11.1174427822 | 0.8931747289 |
| H | 4.7174240001 | 3.5793365340  | 6.4952416379 |
| H | 0.5846823636 | 11.5176955603 | 3.6942970000 |
| H | 6.9016536655 | 3.1584132866  | 3.6942960000 |
| H | 4.1819497438 | 10.4387013019 | 0.0000000000 |
| H | 3.3126699700 | 4.2593110361  | 0.0000000000 |
| H | 0.5523091614 | 8.3028282419  | 0.0000000000 |
| H | 6.9426266782 | 6.3930499547  | 0.0000000000 |
| H | 4.2428926906 | 13.7829850005 | 3.6942970000 |
| H | 3.2535757196 | 0.9109150378  | 3.6942970000 |
| C | 0.7853737361 | 3.2733501187  | 3.6942970000 |
| C | 6.7003919741 | 11.4092328653 | 3.6942960000 |
| C | 4.3957290466 | 4.1226107658  | 0.0000000000 |
| C | 3.0986260177 | 10.5742438449 | 0.0000000000 |
| C | 0.9583284440 | 9.3156488703  | 0.0000000000 |
| C | 6.5364647940 | 5.3804295233  | 0.0000000000 |

|    |              |               |              |
|----|--------------|---------------|--------------|
| C  | 4.5981090547 | 12.7509672630 | 3.6942970000 |
| C  | 2.8936136506 | 1.9409504291  | 3.6942970000 |
| N  | 1.4055663908 | 1.9176468737  | 3.6942970000 |
| N  | 6.0865196700 | 12.7681265581 | 3.6942960000 |
| N  | 5.0505701283 | 5.4614929397  | 0.0000000000 |
| N  | 2.4443955651 | 9.2349026245  | 0.0000000000 |
| Cl | 1.6075772266 | 13.7465890583 | 1.7641750352 |
| Cl | 5.9259507293 | 0.9541140823  | 5.6213421409 |
| Cl | 5.9259507293 | 0.9541140823  | 1.7672508591 |
| Cl | 1.6075772266 | 13.7465890583 | 5.6244179648 |
| Cl | 5.2273265409 | 8.2493526299  | 1.9315565403 |
| Cl | 2.2772776624 | 6.4443874403  | 5.4575394189 |
| Cl | 2.2772776624 | 6.4443874403  | 1.9310535811 |
| Cl | 5.2273265409 | 8.2493526299  | 5.4570364597 |
| Cl | 1.4775967883 | 2.0989580734  | 0.0000000000 |
| Cl | 6.0376577144 | 12.6168920582 | 0.0000000000 |
| Cl | 5.0060703292 | 5.2201110531  | 3.6942970000 |
| Cl | 2.4979344325 | 9.4723606816  | 3.6942970000 |

**4% Compressive Strain**

**Along y-axis**

|    |               |               |              |
|----|---------------|---------------|--------------|
| Sn | -0.0049587870 | 0.2752873332  | 0.0000000000 |
| Sn | 3.7519114830  | 7.3430754704  | 3.6942970000 |
| H  | 0.5767281322  | 9.8153154581  | 0.8969747191 |
| H  | 6.9271203800  | 4.8734006083  | 6.4912853986 |
| H  | 6.9271203800  | 4.8734006083  | 0.8973076014 |
| H  | 0.5767281322  | 9.8153154581  | 6.4916182809 |
| H  | 4.3219211398  | 11.9266111955 | 2.7971977140 |
| H  | 3.1805535627  | 2.7624497902  | 4.5913610126 |
| H  | 3.1805535627  | 2.7624497902  | 2.7972319874 |
| H  | 4.3219211398  | 11.9266111955 | 4.5913952860 |
| H  | 1.0761559290  | 1.5790280060  | 2.8707261950 |
| H  | 6.4275532696  | 13.1081509614 | 4.5171538479 |
| H  | 6.4275532696  | 13.1081509614 | 2.8714391521 |
| H  | 1.0761559290  | 1.5790280060  | 4.5178668050 |

|    |              |               |              |
|----|--------------|---------------|--------------|
| H  | 4.8367224879 | 6.0812814814  | 0.8227710777 |
| H  | 2.6651108611 | 8.6041746194  | 6.5655454607 |
| H  | 2.6651108611 | 8.6041746194  | 0.8230475393 |
| H  | 4.8367224879 | 6.0812814814  | 6.5658219223 |
| H  | 1.0238618773 | 4.0122320945  | 2.8025420770 |
| H  | 6.4846600828 | 10.6750426608 | 4.5866036832 |
| H  | 6.4846600828 | 10.6750426608 | 2.8019893168 |
| H  | 1.0238618773 | 4.0122320945  | 4.5860509230 |
| H  | 4.7507687099 | 3.6486879359  | 0.8927346937 |
| H  | 2.7554927037 | 11.0364105852 | 6.4961499169 |
| H  | 2.7554927037 | 11.0364105852 | 0.8924430831 |
| H  | 4.7507687099 | 3.6486879359  | 6.4958583063 |
| H  | 0.3775275808 | 11.3763473160 | 3.6942970000 |
| H  | 7.1282714521 | 3.3149637204  | 3.6942960000 |
| H  | 4.1419723307 | 10.3163658433 | 0.0000000000 |
| H  | 3.3630596514 | 4.3660730217  | 0.0000000000 |
| H  | 0.4644023815 | 8.2678445267  | 0.0000000000 |
| H  | 7.0370371334 | 6.4208132572  | 0.0000000000 |
| H  | 4.2304769791 | 13.4758926263 | 3.6942970000 |
| H  | 3.2764489137 | 1.2134657380  | 3.6942970000 |
| C  | 0.7071656871 | 3.4638137521  | 3.6942970000 |
| C  | 6.7991657889 | 11.2236635025 | 3.6942960000 |
| C  | 4.4422895111 | 4.2001091432  | 0.0000000000 |
| C  | 3.0632172948 | 10.4840673480 | 0.0000000000 |
| C  | 0.8873998111 | 9.2740983978  | 0.0000000000 |
| C  | 6.6157765485 | 5.4138023241  | 0.0000000000 |
| C  | 4.6394786000 | 12.4636618333 | 3.6942970000 |
| C  | 2.8644367521 | 2.2244343741  | 3.6942970000 |
| N  | 1.3777657484 | 2.1325300213  | 3.6942970000 |
| N  | 6.1260581200 | 12.5533658518 | 3.6942960000 |
| N  | 5.1306682540 | 5.5218834545  | 0.0000000000 |
| N  | 2.3722518571 | 9.1636661726  | 0.0000000000 |
| Cl | 1.4624293552 | 13.4684609057 | 1.7677631912 |
| Cl | 6.0252915241 | 1.1922231178  | 5.6280626280 |
| Cl | 6.0252915241 | 1.1922231178  | 1.7605303720 |

|    |              |               |              |
|----|--------------|---------------|--------------|
| Cl | 1.4624293552 | 13.4684609057 | 5.6208298088 |
| Cl | 5.2202545462 | 8.2588582972  | 1.9291775747 |
| Cl | 2.2831355341 | 6.4264743343  | 5.4591179792 |
| Cl | 2.2831355341 | 6.4264743343  | 1.9294750208 |
| Cl | 5.2202545462 | 8.2588582972  | 5.4594154253 |
| Cl | 1.2940876101 | 2.3718970849  | 0.0000000000 |
| Cl | 6.2076089436 | 12.2788668613 | 0.0000000000 |
| Cl | 5.0529709548 | 5.2513318349  | 3.6942970000 |
| Cl | 2.4512382087 | 9.4346280873  | 3.6942970000 |

**4% Compressive Strain**

**Along z-axis**

|    |              |               |              |
|----|--------------|---------------|--------------|
| Sn | 0.0000000000 | 0.0000000000  | 0.1233163042 |
| Sn | 3.7514610000 | 7.3467290000  | 3.6530517249 |
| H  | 0.4903611723 | 9.8166372033  | 1.0149052294 |
| H  | 7.0040823757 | 4.8040823867  | 6.3116844225 |
| H  | 7.0125598277 | 4.8768207967  | 1.0149052294 |
| H  | 0.4988386243 | 9.8893756133  | 6.3116844225 |
| H  | 4.2532662142 | 12.1877003318 | 2.7755319116 |
| H  | 3.2612842404 | 2.5108077727  | 4.5734758268 |
| H  | 3.2496547858 | 2.5057576682  | 2.7755319116 |
| H  | 4.2416367596 | 12.1826502273 | 4.5734758268 |
| H  | 1.1026047534 | 1.3965144537  | 2.8753201042 |
| H  | 6.3888374922 | 13.2760119495 | 4.5189423530 |
| H  | 6.4003162466 | 13.2969435463 | 2.8753201042 |
| H  | 1.1140835078 | 1.4174460505  | 4.5189423530 |
| H  | 4.8606746942 | 5.9446838510  | 0.9144350428 |
| H  | 2.6408641878 | 8.7584822356  | 6.3646045482 |
| H  | 2.6422463058 | 8.7487741490  | 0.9144350428 |
| H  | 4.8620568122 | 5.9349757644  | 6.3646045482 |
| H  | 1.1364042519 | 3.8275484574  | 2.7758537752 |
| H  | 6.3656690856 | 10.8473467348 | 4.5619028409 |
| H  | 6.3665167481 | 10.8659095426 | 2.7758537752 |
| H  | 1.1372519144 | 3.8461112652  | 4.5619028409 |

|    |              |               |              |
|----|--------------|---------------|--------------|
| H  | 4.8605012910 | 3.5206222225  | 1.0090155788 |
| H  | 2.5919792284 | 11.1938657901 | 6.3174215104 |
| H  | 2.6424197090 | 11.1728357775 | 1.0090155788 |
| H  | 4.9109417716 | 3.4995922099  | 6.3174215104 |
| H  | 0.2819308006 | 11.5110661368 | 3.6757094574 |
| H  | 7.2209901994 | 3.1823918632  | 3.6757084574 |
| H  | 4.0350028357 | 10.5303915909 | 0.0676797576 |
| H  | 3.4679181643 | 4.1630664091  | 0.0676797576 |
| H  | 0.4571968293 | 8.3060627480  | 0.0513960001 |
| H  | 7.0457241707 | 6.3873952520  | 0.0513960001 |
| H  | 4.2114419524 | 13.7344320428 | 3.6791057075 |
| H  | 3.2914790476 | 0.9590259572  | 3.6791057075 |
| C  | 0.8045313212 | 3.2993427702  | 3.6745523733 |
| C  | 6.6983896788 | 11.3941152298 | 3.6745513733 |
| C  | 4.5545121607 | 4.0478040729  | 0.1007738061 |
| C  | 2.9484088393 | 10.6456539271 | 0.1007738061 |
| C  | 0.8307594589 | 9.3308890264  | 0.0969808073 |
| C  | 6.6721615411 | 5.3625689736  | 0.0969808073 |
| C  | 4.5833649456 | 12.7082711922 | 3.6780881467 |
| C  | 2.9195560544 | 1.9851868078  | 3.6780881467 |
| N  | 1.4310827955 | 1.9477962589  | 3.6879879351 |
| N  | 6.0718382045 | 12.7456617411 | 3.6879869351 |
| N  | 5.1834883026 | 5.3984083672  | 0.0964400912 |
| N  | 2.3194326974 | 9.2950496328  | 0.0964400912 |
| Cl | 1.4707729604 | 13.7409953181 | 1.8428886981 |
| Cl | 6.0457652983 | 0.9361522007  | 5.4741409214 |
| Cl | 6.0321480396 | 0.9524626819  | 1.8428886981 |
| Cl | 1.4571557017 | 13.7573057993 | 5.4741409214 |
| Cl | 5.2186672017 | 8.2878571601  | 1.9221532713 |
| Cl | 2.2901396707 | 6.4014212829  | 5.3907442710 |
| Cl | 2.2842537983 | 6.4056008399  | 1.9221532713 |
| Cl | 5.2127813293 | 8.2920367171  | 5.3907442710 |
| Cl | 1.3224768917 | 2.0993298205  | 0.1264177688 |
| Cl | 6.1804441083 | 12.5941281795 | 0.1264177688 |
| Cl | 5.0762630496 | 5.2519361427  | 3.6553383289 |

|    |              |              |              |
|----|--------------|--------------|--------------|
| Cl | 2.4266579504 | 9.4415218573 | 3.6553383289 |
|----|--------------|--------------|--------------|

**6% Compressive Strain**

**Along x-axis**

|    |              |               |              |
|----|--------------|---------------|--------------|
| Sn | 0.2500745066 | 0.0062397932  | 0.0000000000 |
| Sn | 3.7479910745 | 7.3458064623  | 3.6942970000 |
| H  | 0.6834266419 | 9.8777756452  | 0.8981550078 |
| H  | 6.8066153325 | 4.8230479104  | 6.4903942790 |
| H  | 6.8066153325 | 4.8230479104  | 0.8981987210 |
| H  | 0.6834266419 | 9.8777756452  | 6.4904379922 |
| H  | 4.2107322520 | 12.2285663046 | 2.7947410976 |
| H  | 3.2746422440 | 2.4657843148  | 4.5941208616 |
| H  | 3.2746422440 | 2.4657843148  | 2.7944721384 |
| H  | 4.2107322520 | 12.2285663046 | 4.5938519024 |
| H  | 1.1061909285 | 1.3964739013  | 2.8724695829 |
| H  | 6.3834844031 | 13.2848533763 | 4.5168320022 |
| H  | 6.3834844031 | 13.2848533763 | 2.8717609978 |
| H  | 1.1061909285 | 1.3964739013  | 4.5161234171 |
| H  | 4.7001696430 | 6.0031583122  | 0.8231790786 |
| H  | 2.7879096432 | 8.6938776003  | 6.5653845224 |
| H  | 2.7879096432 | 8.6938776003  | 0.8232084776 |
| H  | 4.7001696430 | 6.0031583122  | 6.5654139214 |
| H  | 1.1688828989 | 3.8203631035  | 2.8017627569 |
| H  | 6.3056099827 | 10.8593212647 | 4.5862893470 |
| H  | 6.3056099827 | 10.8593212647 | 2.8023036530 |
| H  | 1.1688828989 | 3.8203631035  | 4.5868302431 |
| H  | 4.6755659633 | 3.5732130357  | 0.8927944310 |
| H  | 2.8147872986 | 11.1241907999 | 6.4960029728 |
| H  | 2.8147872986 | 11.1241907999 | 0.8925900272 |
| H  | 4.6755659633 | 3.5732130357  | 6.4957985690 |
| H  | 0.6804497569 | 11.4925146434 | 3.6942970000 |
| H  | 6.7999017887 | 3.1758801866  | 3.6942960000 |
| H  | 4.2199146613 | 10.4441041232 | 0.0000000000 |
| H  | 3.2706476773 | 4.2532511713  | 0.0000000000 |
| H  | 0.5748637844 | 8.3322948237  | 0.0000000000 |

|    |              |               |              |
|----|--------------|---------------|--------------|
| H  | 6.9121594533 | 6.3684850004  | 0.0000000000 |
| H  | 4.2032556106 | 13.7749067552 | 3.6942970000 |
| H  | 3.2926997223 | 0.9195222275  | 3.6942970000 |
| C  | 0.8335712746 | 3.2843773267  | 3.6942970000 |
| C  | 6.6457613332 | 11.3934531766 | 3.6942960000 |
| C  | 4.3532436146 | 4.1168269985  | 0.0000000000 |
| C  | 3.1372347102 | 10.5803089946 | 0.0000000000 |
| C  | 0.9950944428 | 9.3391230535  | 0.0000000000 |
| C  | 6.4938872120 | 5.3608947538  | 0.0000000000 |
| C  | 4.5557984347 | 12.7431344699 | 3.6942970000 |
| C  | 2.9335528828 | 1.9490856525  | 3.6942970000 |
| N  | 1.4473019100 | 1.9273166089  | 3.6942970000 |
| N  | 6.0425193801 | 12.7556771246 | 3.6942960000 |
| N  | 5.0099598753 | 5.4541436961  | 0.0000000000 |
| N  | 2.4791377073 | 9.2434637177  | 0.0000000000 |
| Cl | 1.6827283181 | 13.7382977905 | 1.7638381100 |
| Cl | 5.8662556512 | 0.9634971985  | 5.6248570575 |
| Cl | 5.8662556512 | 0.9634971985  | 1.7637359425 |
| Cl | 1.6827283181 | 13.7382977905 | 5.6247548900 |
| Cl | 5.2228514741 | 8.2446611043  | 1.9315176041 |
| Cl | 2.2719870995 | 6.4489232903  | 5.4569729285 |
| Cl | 2.2719870995 | 6.4489232903  | 1.9316200715 |
| Cl | 5.2228514741 | 8.2446611043  | 5.4570753959 |
| Cl | 1.5661957842 | 2.0917725004  | 0.0000000000 |
| Cl | 5.9670393050 | 12.6250896666 | 0.0000000000 |
| Cl | 4.9912287235 | 5.2179700360  | 3.6942970000 |
| Cl | 2.5060848243 | 9.4759001316  | 3.6942970000 |

### **6% Compressive Strain**

#### **Along y-axis**

|    |               |              |              |
|----|---------------|--------------|--------------|
| Sn | -0.0056027309 | 0.4189163651 | 0.0000000000 |
| Sn | 3.7525717303  | 7.3388975719 | 3.6942970000 |
| H  | 0.5830787748  | 9.8175605850 | 0.8966122131 |
| H  | 6.9206649117  | 4.8681476460 | 6.4922442192 |
| H  | 6.9206649117  | 4.8681476460 | 0.8963487808 |

|   |              |               |              |
|---|--------------|---------------|--------------|
| H | 0.5830787748 | 9.8175605850  | 6.4919807869 |
| H | 4.3360764741 | 11.8255946440 | 2.7967066043 |
| H | 3.1657647189 | 2.8607824872  | 4.5918263855 |
| H | 3.1657647189 | 2.8607824872  | 2.7967666145 |
| H | 4.3360764741 | 11.8255946440 | 4.5918863957 |
| H | 1.0544605268 | 1.6883539010  | 2.8716852039 |
| H | 6.4490051333 | 12.9942096390 | 4.5163147546 |
| H | 6.4490051333 | 12.9942096390 | 2.8722782454 |
| H | 1.0544605268 | 1.6883539010  | 4.5169077961 |
| H | 4.8616370960 | 6.1266004964  | 0.8224361230 |
| H | 2.6384933954 | 8.5530873949  | 6.5661999911 |
| H | 2.6384933954 | 8.5530873949  | 0.8223930089 |
| H | 4.8616370960 | 6.1266004964  | 6.5661568770 |
| H | 1.0136684195 | 4.1220219939  | 2.8034185367 |
| H | 6.4933671532 | 10.5616001859 | 4.5861536932 |
| H | 6.4933671532 | 10.5616001859 | 2.8024393068 |
| H | 1.0136684195 | 4.1220219939  | 4.5851744633 |
| H | 4.7159450082 | 3.6950929782  | 0.8921467286 |
| H | 2.7920633905 | 10.9847823734 | 6.4965459886 |
| H | 2.7920633905 | 10.9847823734 | 0.8920470114 |
| H | 4.7159450082 | 3.6950929782  | 6.4964462714 |
| H | 0.3894482384 | 11.2576105865 | 3.6942970000 |
| H | 7.1160480572 | 3.4278507195  | 3.6942960000 |
| H | 4.1584202103 | 10.2289398199 | 0.0000000000 |
| H | 3.3460807730 | 4.4455194860  | 0.0000000000 |
| H | 0.4337822330 | 8.2732361329  | 0.0000000000 |
| H | 7.0659866309 | 6.4135465596  | 0.0000000000 |
| H | 4.2580373661 | 13.3747700137 | 3.6942970000 |
| H | 3.2487778444 | 1.3105799084  | 3.6942970000 |
| C | 0.6947721384 | 3.5738280910  | 3.6942970000 |
| C | 6.8109940996 | 11.1088370897 | 3.6942960000 |
| C | 4.4204312947 | 4.2538708449  | 0.0000000000 |
| C | 3.0851209279 | 10.4245157608 | 0.0000000000 |
| C | 0.8810049441 | 9.2689213801  | 0.0000000000 |
| C | 6.6214367996 | 5.4164441425  | 0.0000000000 |

|    |              |               |              |
|----|--------------|---------------|--------------|
| C  | 4.6577011139 | 12.3593185353 | 3.6942970000 |
| C  | 2.8464606408 | 2.3251283351  | 3.6942970000 |
| N  | 1.3598140221 | 2.2410484751  | 3.6942970000 |
| N  | 6.1441171037 | 12.4404158157 | 3.6942960000 |
| N  | 5.1398033431 | 5.5581152896  | 0.0000000000 |
| N  | 2.3618957698 | 9.1225167145  | 0.0000000000 |
| Cl | 1.4540836935 | 13.3058578958 | 1.7685067953 |
| Cl | 6.0342287848 | 1.3483194002  | 5.6275543717 |
| Cl | 6.0342287848 | 1.3483194002  | 1.7610386283 |
| Cl | 1.4540836935 | 13.3058578958 | 5.6200862047 |
| Cl | 5.2304798248 | 8.2432092748  | 1.9302440815 |
| Cl | 2.2748274766 | 6.4352760135  | 5.4585423752 |
| Cl | 2.2748274766 | 6.4352760135  | 1.9300506247 |
| Cl | 5.2304798248 | 8.2432092748  | 5.4583489185 |
| Cl | 1.3187956053 | 2.4918744121  | 0.0000000000 |
| Cl | 6.1865637066 | 12.1493737463 | 0.0000000000 |
| Cl | 5.0417972498 | 5.2485357780  | 3.6942970000 |
| Cl | 2.4633003236 | 9.4299476068  | 3.6942970000 |

**6% Compressive Strain**

**Along z-axis**

|    |              |               |              |
|----|--------------|---------------|--------------|
| Sn | 0.0000000000 | 0.0000000000  | 0.2003670869 |
| Sn | 3.7514610000 | 7.3467290000  | 3.6172155206 |
| H  | 0.5103990166 | 9.8227110776  | 1.0843588251 |
| H  | 7.0162654588 | 4.7786767241  | 6.2341300306 |
| H  | 6.9925219834 | 4.8707469224  | 1.0843588251 |
| H  | 0.4866555412 | 9.9147812759  | 6.2341300306 |
| H  | 4.2597311430 | 12.1823565519 | 2.7488244751 |
| H  | 3.2640982233 | 2.5339564071  | 4.5467780358 |
| H  | 3.2431898570 | 2.5111014481  | 2.7488244751 |
| H  | 4.2388227767 | 12.1595015929 | 4.5467780358 |
| H  | 1.1023366255 | 1.3999571616  | 2.8701717720 |
| H  | 6.3843703770 | 13.2537552376 | 4.5123142533 |
| H  | 6.4005843745 | 13.2935008384 | 2.8701717720 |
| H  | 1.1185506230 | 1.4397027624  | 4.5123142533 |

|    |              |               |              |
|----|--------------|---------------|--------------|
| H  | 4.8561308343 | 5.9485132899  | 0.9429242412 |
| H  | 2.6336085356 | 8.7850133400  | 6.2445597877 |
| H  | 2.6467901657 | 8.7449447101  | 0.9429242412 |
| H  | 4.8693124644 | 5.9084446600  | 6.2445597877 |
| H  | 1.1320682779 | 3.8273090107  | 2.7437837579 |
| H  | 6.3569008700 | 10.8264188146 | 4.5292446544 |
| H  | 6.3708527221 | 10.8661489893 | 2.7437837579 |
| H  | 1.1460201300 | 3.8670391854  | 4.5292446544 |
| H  | 4.8803592911 | 3.5285156255  | 1.0796665651 |
| H  | 2.6015235573 | 11.2193961447 | 6.2398970620 |
| H  | 2.6225617089 | 11.1649423745 | 1.0796665651 |
| H  | 4.9013974427 | 3.4740618553  | 6.2398970620 |
| H  | 0.2804748395 | 11.4993657310 | 3.6610634865 |
| H  | 7.2224461605 | 3.1940922690  | 3.6610624865 |
| H  | 4.0304613118 | 10.5392549703 | 0.1516229601 |
| H  | 3.4724596882 | 4.1542030297  | 0.1516229601 |
| H  | 0.4550686891 | 8.3220737471  | 0.1066933119 |
| H  | 7.0478523109 | 6.3713842529  | 0.1066933119 |
| H  | 4.2101221900 | 13.7202464944 | 3.6667486070 |
| H  | 3.2927988100 | 0.9732115056  | 3.6667486070 |
| C  | 0.8060161143 | 3.3104443324  | 3.6510779121 |
| C  | 6.6969048857 | 11.3830136676 | 3.6510769121 |
| C  | 4.5585848218 | 4.0383206217  | 0.1670689831 |
| C  | 2.9443361782 | 10.6551373783 | 0.1670689831 |
| C  | 0.8316223697 | 9.3452289028  | 0.1551419897 |
| C  | 6.6712986303 | 5.3482290972  | 0.1551419897 |
| C  | 4.5834354936 | 12.6945852577 | 3.6584268473 |
| C  | 2.9194855064 | 1.9988727423  | 3.6584268473 |
| N  | 1.4322512726 | 1.9606125173  | 3.6753706070 |
| N  | 6.0706697274 | 12.7328454827 | 3.6753696070 |
| N  | 5.1841983641 | 5.3884048364  | 0.1367874123 |
| N  | 2.3187226359 | 9.3050531636  | 0.1367874123 |
| Cl | 1.4706654360 | 13.7608482543 | 1.9200766893 |
| Cl | 6.0283687541 | 0.9490483513  | 5.4391559964 |
| Cl | 6.0322555640 | 0.9326097457  | 1.9200766893 |

|    |              |               |              |
|----|--------------|---------------|--------------|
| Cl | 1.4745522459 | 13.7444096487 | 5.4391559964 |
| Cl | 5.2303851158 | 8.2845300664  | 1.9035176186 |
| Cl | 2.2735142849 | 6.3890225677  | 5.3226642453 |
| Cl | 2.2725358842 | 6.4089279336  | 1.9035176186 |
| Cl | 5.2294067151 | 8.3044354323  | 5.3226642453 |
| Cl | 1.3235274487 | 2.1032956423  | 0.1948898526 |
| Cl | 6.1793935513 | 12.5901623577 | 0.1948898526 |
| Cl | 5.0680268965 | 5.2443286824  | 3.6259232167 |
| Cl | 2.4348941035 | 9.4491293176  | 3.6259232167 |

**Table S3: Evolution of Sn–Cl bond lengths and Cl–Sn–Cl bond angles with applied strain.**

| Strain (%)      | Sn–Cl bond length (Å) | cis-Cl–Sn–Cl angle (°) | trans-Cl–Sn–Cl angle (°) |
|-----------------|-----------------------|------------------------|--------------------------|
| 0               | 2.4745                | 90.328                 | 180                      |
| 2 (Tensile)     | 2.4780                | 90.334                 | 179.998                  |
| 4 (Tensile)     | 2.4783                | 90.385                 | 179.972                  |
| 6 (Tensile)     | 2.4792                | 90.335                 | 179.949                  |
| 2 (Compressive) | 2.4713                | 90.551                 | 179.972                  |
| 4 (Compressive) | 2.4689                | 90.629                 | 179.999                  |
| 6 (Compressive) | 2.4657                | 90.729                 | 179.947                  |

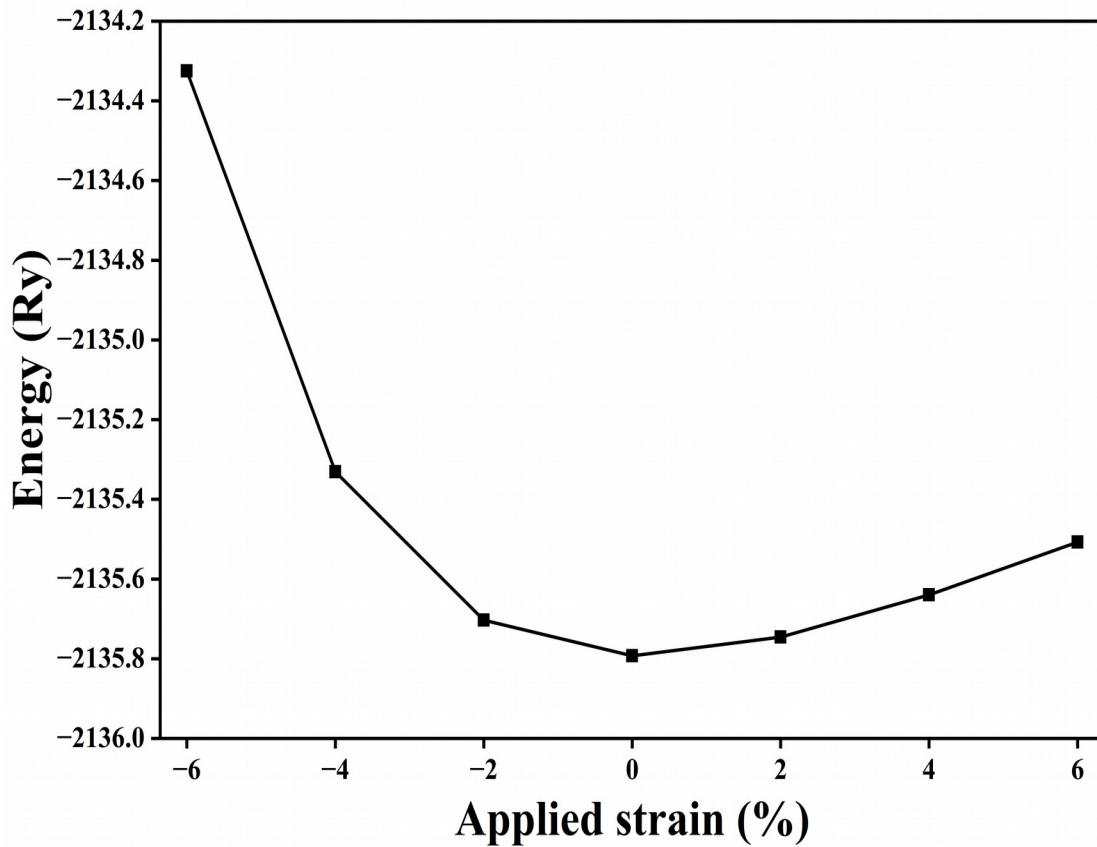

**Fig. S2: Variation of total energy (in Ry) as a function of applied strain (-6% to +6%), showing a minimum near the equilibrium (0% strain) and an increase in energy under both compressive and tensile deformation, indicating structural stability around the unstrained configuration.**
